# Supplementary material
Source: PubMed Central journal article supplement (PMC5993982)
Supplement: mmc1.pdf [file mmc1.pdf]

YMTHE, Volume 26

## **Supplemental Information**

**Radionuclide Imaging-Guided Chemo-Radioisotope**

**Synergistic Therapy Using a <sup>131</sup>I-Labeled**

**Polydopamine Multifunctional Nanocarrier**

**Zhiqiang Li, Baikui Wang, Zheng Zhang, Bo Wang, Qiangqiang Xu, Wenjie Mao, Jie Tian, Kai Yang, and Fu Wang**

## Supporting information

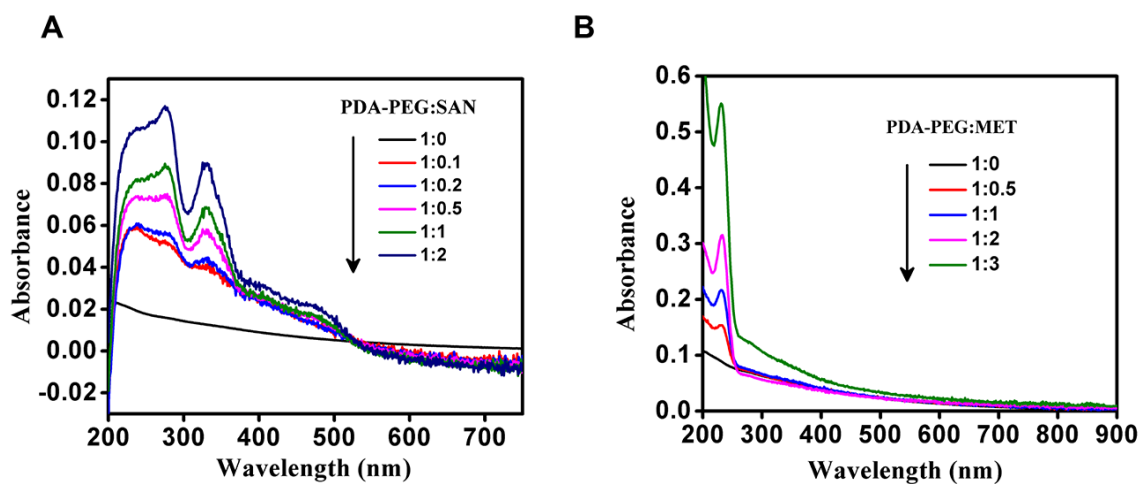

**Supporting Figure S1.** UV-vis-NIR absorbance spectra of (A) PDA-PEG-SAN and (B) PDA-PEG-MET obtained at different PDA:SAN or PDA:MET feeding ratios.
